1 ***In Vivo* Dual RNA-Seq Analysis Reveals the Basis for**  
2 **Differential Tissue Tropism of Clinical Isolates of**  
3 ***Streptococcus pneumoniae***

4  
5 **Vikrant Minhas,<sup>1,4</sup> Rieza Aprianto,<sup>2,4</sup> Lauren J. McAllister,<sup>1</sup> Hui Wang,<sup>1</sup> Shannon C.**  
6 **David,<sup>1</sup> Kimberley T. McLean,<sup>1</sup> Iain Comerford,<sup>3</sup> Shaun R. McColl,<sup>3</sup> James C.**  
7 **Paton,<sup>1,5,6,\*</sup> Jan-Willem Veening,<sup>2,5</sup> and Claudia Trappetti,<sup>1,5</sup>**

8  
9 <sup>1</sup>Research Centre for Infectious Diseases, Department of Molecular and Biomedical Science,  
10 University of Adelaide, Adelaide, 5005, Australia

11 <sup>2</sup>Department of Fundamental Microbiology, Faculty of Biology and Medicine, University of  
12 Lausanne, CH-1015 Lausanne, Switzerland

13 <sup>3</sup>Department of Molecular and Biomedical Science, University of Adelaide, Adelaide, 5005,  
14 Australia

15 <sup>4</sup>Equal contribution

16 <sup>5</sup>Senior authors

17 <sup>6</sup>Lead contact

18 \*Correspondence: [james.paton@adelaide.edu.au](mailto:james.paton@adelaide.edu.au)

19

20

21 **ABSTRACT**

22 *Streptococcus pneumoniae* is a genetically diverse human-adapted pathogen commonly carried  
23 asymptotically in the nasopharynx. We have recently shown that a single nucleotide  
24 polymorphism (SNP) in the raffinose pathway regulatory gene *rafR* accounts for a significant  
25 difference in the capacity of clonally-related strains to cause localised versus systemic infection.  
26 Here we have used dual RNA-seq to show that this SNP extensively impacts both bacterial and  
27 host transcriptomes in infected lungs. It affects expression of bacterial genes encoding multiple  
28 sugar transporters, and fine-tunes carbohydrate metabolism, along with extensive rewiring of  
29 host transcriptional responses to infection, particularly expression of genes encoding cytokine  
30 and chemokine ligands and receptors. The dual RNA-seq data predicted a crucial role for  
31 differential neutrophil recruitment in the distinct virulence profiles of the infecting strains and  
32 single cell analysis revealed that while reduced expression of the RafR regulon driven by a  
33 single *rafR* SNP provides a clear advantage for pneumococci to colonize the ear, in the lung it  
34 leads to massive recruitment of neutrophils and bacterial clearance. Importantly, the observed  
35 disease outcomes were confirmed by *in vivo* neutrophil depletion showing that early detection  
36 of bacteria by the host in the lung environment is crucial for effective clearance. Thus, dual  
37 RNA-seq provides a powerful tool for understanding complex host-pathogen interactions and  
38 revealed how a single bacterial SNP can drive differential disease outcomes.

39

## 40 INTRODUCTION

41 *Streptococcus pneumoniae* is a major human pathogen responsible for massive global morbidity  
42 and mortality. Despite this, the pneumococcus makes up part of the commensal human  
43 nasopharyngeal flora, colonizing up to 65% of individuals (Kadioglu et al., 2008) (Weiser et  
44 al., 2018). *S. pneumoniae* can invade from this nasopharyngeal reservoir to cause disease, for  
45 example, by aspiration into the lungs to cause pneumonia, by direct or indirect invasion of the  
46 blood (bacteremia) or central nervous system (meningitis), or by ascension of the eustachian  
47 tube to access the middle ear and cause the localised disease otitis media (OM) (Kadioglu et  
48 al., 2008)(Weiser et al., 2018). *S. pneumoniae* is an extremely heterogeneous species,  
49 comprising at least 98 capsular serotypes and over 12,000 clonal lineages (sequence types; ST)  
50 recognisable by multi-locus sequence typing (Enright and Spratt, 1998; van Tonder et al.,  
51 2019). Unsurprisingly, *S. pneumoniae* strains differ markedly in their capacity to progress from  
52 carriage to disease and/or the nature of the disease that they cause (Kadioglu et al., 2008; Weiser  
53 et al., 2018).

54 We have previously reported marked differences in virulence in a murine intranasal (IN)  
55 challenge model between *S. pneumoniae* strains belonging to the same serotype and ST, which  
56 correlated with clinical isolation site in humans (ear versus blood). In serotype 3 ST180, ST232  
57 and ST233, and in serotype 14 ST15, human ear isolates had greater capacity to cause OM in  
58 mice relative to their respective serotype-/ST-matched blood isolates, while blood isolates  
59 preferentially caused pneumonia or sepsis in mice, suggesting stable niche adaptation within a  
60 clonal lineage (Amin et al., 2015; Trappetti et al., 2013). Recently, we have shown that the  
61 distinct virulence phenotypes correlated with single nucleotide polymorphisms (SNPs) in genes  
62 encoding uptake and utilization of the sugar raffinose. In serotype 14 ST15, the SNP was in the  
63 raffinose pathway regulatory gene *rafR*, while in serotype 3 ST180, the SNP was in *rafK*, which  
64 encodes an ATPase that energises the raffinose uptake ABC transporter (Minhas et al., 2019).  
65 Both SNPs result in non-conservative amino acid changes in functionally critical domains of  
66 the respective gene product (D249G for RafR; I227T for RafK). Moreover, in both  
67 serotypes/lineages, ear isolates had *in vitro* growth defects in a chemically-defined medium

68 with raffinose as the sole carbon source, correlating with defective transcription of raffinose  
69 pathway operons. Remarkably, in serotype 14 ST15, exchanging the *rafR* alleles between blood  
70 and ear isolates reversed both the *in vitro* and *in vivo* phenotypes (Minhas et al., 2019). Thus,  
71 the single D249G SNP in *rafR* appears to be the determinant of differential virulence phenotype  
72 between the blood and ear isolates, which may reflect differential engagement of innate host  
73 defences and/or differential bacterial nutritional fitness in distinct host niches (**Figure 1**).

74 Dual RNA-seq applies deep sequencing to simultaneously quantify genome-wide  
75 transcriptional responses of host and pathogen (Westermann et al., 2017; Wolf et al., 2018).  
76 This approach offers higher efficiency and more restricted technical bias compared to  
77 conventional approaches, such as assaying single species or array-based methods. In the present  
78 study, we have used dual RNA-seq analysis to examine host-pathogen transcriptional cross-talk  
79 in the blood and ear isolates and *rafR*-swapped derivatives thereof, during the early stages of  
80 infection. Our data strongly suggest that the *rafR* SNP interacts with the pneumococcal genetic  
81 background in the different clinical isolates, which in turn, induces variegated transcriptional  
82 responses in the pathogen; this response, in turn, initiates a diverging host response that  
83 determines the outcome of infection.

84

## 85 **RESULTS AND DISCUSSION**

### 86 **Comparative Host/Pathogen Transcriptomics**

87 Our previous studies have shown that at 6 h after IN challenge with serotype 14 ST15 *S.*  
88 *pneumoniae*, the numbers of blood and ear isolates (strains 4559-Blood and 9-47-Ear,  
89 respectively) present in murine lungs are similar ( $10^6 - 10^7$  CFU per lung). However, by 24 h,  
90 the ear isolate had been cleared from the lungs, instead spreading to the ear and brain. In  
91 contrast, the blood isolate persisted in the lungs at 24 h, but did not spread to the ear or brain  
92 (Amin et al., 2015). Thus, 6 h post infection is a critical decision point in the pathogenic process,  
93 and the similarity of bacterial loads in the lung at this time enables examination of the  
94 transcriptional cross-talk between the pneumococcus and its host without the complication of

95 bacterial dose effects. Accordingly, groups of 12 mice were anaesthetized and challenged IN  
96 with  $10^8$  CFU of either 4559-Blood, 9-47-Ear or their respective *rafR*-swapped mutants (**Table**  
97 **1**); at 6 h, mice were euthanized and total RNA was extracted from perfused lungs and purified.  
98 RNA extracted from lungs of 4 mice were pooled into 1 sample for subsequent Dual RNA-seq  
99 analysis in triplicate (see Methods).

100         Within the sequencing libraries, an overwhelming majority of reads originate from the  
101 host genome (average: 99.5%, range: 99.1 to 99.7%), which translates into an average depth of  
102 1.3 times (range: 0.8 to 1.8 times). Conversely, 0.52% of the total reads originated from the  
103 pathogen genome (0.33 to 0.93%). Of these pneumococcal reads, 64.5% mapped onto the genes  
104 encoding ribosomal RNAs (61.4 to 67.3%) and 35.5% reads mapped onto non-rRNA encoding  
105 genes (32.7 to 38.6%). Previous data indicate that non-depleted libraries only contain 5% non-  
106 ribosomal RNA reads; thus, this treatment enriched the non-ribosomal RNAs sevenfold. Non-  
107 ribosomal reads depth was 2.7 times for the pathogen genome, ranging from 1.4 to 4.6 times.  
108 Further downstream analysis, including differential gene expression, excluded ribosomal reads  
109 from the pathogen library. Tables **S1-S6** list pneumococcal genes that are significantly  
110 differentially expressed (fold change (FC)  $>2$ ,  $p < 0.05$ ) for each of the six pairwise comparisons  
111 between the four strains. Tables **S7-S12** list murine genes that are significantly differentially  
112 expressed (FC  $>1.5$ ,  $p < 0.05$ ) for the same pairwise comparisons.

113

## 114 **Fine Tuning of Carbohydrate Metabolism Driven by RafR During Pneumococcal** 115 **Infection**

116 In order to directly compare pathogen transcriptional responses in murine lung, we listed  
117 homologous genes between the two wild type ear and blood isolates and used these genes to  
118 visualize the transcriptional response in a principal component analysis (PCA) plot (**Figure 2a**).  
119 Here, the pneumococcal transcriptional response of the ear isolate (strain 9-47-Ear, dark orange)  
120 to murine lung infection diverges considerably from the response of the blood isolate (strain  
121 4559-Blood, dark purple). Specifically, 76 homologous genes are significantly upregulated in

122 the ear isolate, while 40 genes are upregulated in the blood isolate in the murine lung.  
123 Upregulated genes in strain 9-47-Ear include genes involved in carbohydrate metabolism,  
124 general stress response and nutrient transporters, while upregulated genes in the blood isolate  
125 include genes encoding permeases for small molecules and nisin biosynthesis orthologous  
126 proteins.

127 Furthermore, replacing the *rafR* of the ear isolate 9-47-Ear with the allele from the blood  
128 isolate 4559-Blood (designated strain 9-47M) dissociates its transcriptional response  
129 considerably from its parental 9-47-Ear strain (**Figure 2a**, 9-47-Ear, dark orange to 9-47M,  
130 light orange). Specifically, 87 genes are upregulated in the wild type strain (9-47-Ear) while 36  
131 genes are upregulated in the *rafR* swap strain (9-47M, **Figure 2b**), with differentially expressed  
132 genes being spread across the pneumococcal genome. Presence of the blood isolate *rafR* allele  
133 in 9-47-Ear activates the expression of major genes pertaining to carbohydrate metabolism,  
134 including *adhA* (alcohol dehydrogenase) and *spxB* (pyruvate oxidase); and genes encoding  
135 permeases, including *glnH6P6* (transporting arginine, cysteine) and *ycjOP-yesO* (transporting  
136 multiple sugars). Also, a subset of genes with function in carbohydrate metabolism are  
137 repressed in the *rafR*-swap strain, such as glycogen synthesis (*glgACD*) and sucrose metabolism  
138 (*scrB*) and ribulose metabolism (*ulaDEF*). Expression of seven genes encoding subunits of  
139 ATPase (*ntpABCDEGK*) and genes coding for iron (*piuB*) and sugar (*scrA*, *satABC*, *gadEW*)  
140 permeases are also repressed.

141 On the other hand, replacing the blood isolate *rafR* with the ear allele (designated strain  
142 4559M) does not noticeably interrupt pneumococcal transcriptional response to murine lung  
143 (**Figure 2a**, 4559-Blood, dark purple to 4559M, light purple). Essentially, the *rafR* swap  
144 activates only two genes: *yxIF*, encoding a putative subunit of an ABC transporter and *phoUI*  
145 encoding a phosphate transporter; and represses 35 genes, mostly contained in a single genomic  
146 island (**Figure 2c**, upregulated in 4559-Blood). The genomic island consists of 28 consecutive  
147 genes encoding subunits of bacteriophage(s), interspaced by *dnaC*, encoding a DNA replication  
148 protein and *lytA*, encoding autolysin. The activation of bacteriophage-associated genes  
149 indicates that the original isolate (strain 4559-Blood) endures host-derived stress, unlike the

150 *rafR* swap mutant (strain 4559M). Other genes repressed in 4559M include *adhAE* (alcohol  
151 dehydrogenases), *gtfA* (sucrose phosphorylase) and *rafEG* (raffinose sugar transporter). Taken  
152 together, the single D249G SNP in *rafR* interferes with global gene expression within the  
153 already transcriptionally-distinct parental clinical isolates. This effect is more pronounced in  
154 the ear isolate (9-47-Ear) than the blood isolate (4559-Blood).

155 Next, we performed quantified enrichment analyses on specific gene functions.  
156 Carbohydrate metabolism is enriched in the differentially expressed genes between the  
157 pneumococcal strains, particularly when comparing the ear isolate to its cognate *rafR* swap  
158 (**Figure 2d**, *comparison A*, 9-47-Ear vs 9-47M,  $p = 0.03$ ), comparing the two clinical isolates  
159 (*comparison B*, 9-47-Ear vs 4559-Blood,  $p = 0.017$ ) and comparing the swap cognates  
160 (*comparison E*, 9-47M vs. 4559M,  $p = 0.041$ ). Another function, ABC transporters, is also  
161 enriched in the comparison within the ear isolates (**Figure 2e**, *comparison A*, 9-47-Ear vs. 9-  
162 47M,  $p = 0.049$ ), between the original isolates (*comparison B*, 9-47-Ear vs 4559-Blood,  $p =$   
163  $0.014$ ), between ear isolate and *rafR* 746G in blood isolate (*comparison C*, 9-47-Ear vs. 4559M,  
164  $p = 0.01$ ) and between the *rafR* cognates (*comparison E*, 9-47M vs. 4559M,  $p = 1.8 \times 10^{-4}$ ).

165 Additionally, since the pneumococcal genome has an exceptionally high number of  
166 sugar transporters (Bidossi et al., 2012), we quantified enrichment for this function (**Figure 2f**).  
167 Sugar transporters are enriched in almost all comparisons (except between 4559-Blood and  
168 4559M), highlighting the role of *rafR* in the widespread regulation of pneumococcal sugar  
169 importers. Specifically, ear and blood isolates behave differently in regard to sugar transporter  
170 expression (9-47-Ear vs. 4559-Blood, **Figure 2f**, *comparison B*). The ear isolate upregulates  
171 *scrA* (encoding a mannose and trehalose transporter) and *ulaA* (ascorbate transporter), while  
172 the blood isolate upregulates *ycjOP-yesO* (alternative sugar transporters), *rafE* (raffinose  
173 transporter) and *malFG* (maltose transporter). Furthermore, *rafR* swap in the ear isolate  
174 background (9-47-Ear vs. 9-47M, **Figure 2f**, *comparison A*) reduces the expression of *gadEW*  
175 (encoding sorbose and mannose transporter), *satABC* (arabinose and lactose transporter), *ulaAC*  
176 and *glpF* (glycerol transporter), while the swap activates the expression of *ycjOP-yesO* and  
177 *bguD* (encoding complex polysaccharide transporters). In contrast, *rafR* swap in the blood



178 isolate background (4559-Blood vs. 4559M, **Figure 2f**, *comparison F*) downregulates the  
179 expression of *rafEG* and *malD* (maltose transporter). The enrichment analysis reveals that the  
180 D249G SNP in *rafR* directly and indirectly affects the expression of genes encoding sugar  
181 transporters, other (ABC) transporters and carbohydrate metabolism.

182 We also identified genes that were commonly up or down regulated between the strains  
183 that persisted in murine lungs (4559-Blood and 9-47M) or the strains that were cleared from  
184 the lungs by 24 h post-infection (9-47-Ear and 4559M), as these may be determinants of the  
185 distinct virulence phenotypes of the blood and ear isolates. *adhP* (Sp947\_00279) was  
186 significantly upregulated in the strains that persisted in the lungs, 9-47M and 4559-Blood (9-  
187 47-Ear vs 9-47M, FC = 0.48,  $p = 0.004$ ; 9-47-Ear vs 4559-Blood, FC = 0.32,  $p = 5.38 \times 10^{-7}$ ; 9-  
188 47M vs 4559M = 2.39,  $p = 0.00018$ ; 4559-Blood vs 4559M, FC = 3.53,  $p = 2.23 \times 10^{-8}$ ).  
189 Additionally, an operon containing two permeases, Sp947\_01595 and Sp947\_01596, and a  
190 putative beta-D-galactosidase Sp947\_01598, involved in the import of sialic acid and N-  
191 Acetylmannosamine, were highly down regulated by 947-Ear, and less so by 9-47M (9-47-Ear  
192 vs 9-47M, FC's = 0.05, 0.06 and 0.06,  $p = 1.12 \times 10^{-6}$ ,  $1.70 \times 10^{-7}$  and  $7.36 \times 10^{-5}$ ; 9-47-Ear vs  
193 4559-Blood. FC's = 0.02, 0.02 and 0.02,  $p = 9.79 \times 10^{-12}$ ,  $2.70 \times 10^{-13}$  and  $2.11 \times 10^{-8}$ ; 9-47M vs  
194 4559M, FC's = 0.32, 0.35 and 0.36,  $p = 1.02 \times 10^{-7}$ ,  $2.53 \times 10^{-7}$  and 0.00016, respectively). 8  
195 genes from the genomic region Sp947\_0842 to Sp947\_0855, as well as Sp947\_00631 and  
196 Sp947\_02096, were significantly upregulated in the strains that were cleared from the lungs by  
197 24 h post-infection, 9-47-Ear and 4559M (for 9-47-Ear vs 9-47M, 9-47-Ear vs 4559-Blood and  
198 9-47M vs 4559M comparisons). Among these genes was a sialidase, Sp947\_00844 (9-47-Ear  
199 vs 9-47M, FC = 313,  $p = 3.08 \times 10^{-10}$ ; 9-47-Ear vs 4559-Blood, FC = 2.53,  $p = 1.14 \times 10^{-8}$ ; 9-47M  
200 vs 4559M, FC = 0.01,  $p = 4.59 \times 10^{-8}$ ). Alpha-glycerophosphate oxidase *glpO*, Sp947\_02129,  
201 was also found to be upregulated in 9-47-Ear and 4559M (9-47-Ear vs 9-47M, FC = 5.86,  $p =$   
202  $1.19 \times 10^{-37}$ ; 9-47-Ear vs 4559-Blood, FC = 1.89,  $p = 2.26 \times 10^{-7}$ ; 9-47M vs 4559M, FC = 0.25,  $p$   
203  $= 3.55 \times 10^{-23}$ ).

## 204 **Extensive RafR-Specific Rewiring of Host Transcriptional Responses to Infection**



205 The measured murine transcriptional response represents the aggregate gene expression of all  
206 (host) cells present during pneumococcal infection in the lung. These include epithelial cells,  
207 endothelial cells of lung vasculature, smooth muscle cells, fibroblasts, activated and non-  
208 activated immune cells. The host transcriptional response was specific to the infecting  
209 pneumococcal strain (**Figure 3a**). Specifically, there was a diverging host response to the ear  
210 isolate (9-47-Ear, dark orange) and blood isolate (4559-Blood, dark purple). Interestingly, *rafR*  
211 swap in blood isolate background (4559M, light purple) mimics the lung response to the wild  
212 type ear isolate (9-47-Ear, dark orange); the two strains harbor the D249 *rafR* allele.  
213 Surprisingly, the *rafR* swap in the 9-47-Ear background (9-47M, light orange) which harbours  
214 the G249 allele, does not drive the host response to mimic those of the wild type 4559-Blood  
215 strain (dark purple) that also has the G249 allele, but rather towards a new, third position of  
216 genome-wide expression.

217 Genome-wide plotting of the murine transcriptional response to *S. pneumoniae* strain 9-  
218 47-Ear (ear isolate) and to strain 4559-Blood (blood isolate) shows an extensive rewiring of  
219 gene expression across the murine chromosomes, and the response is specific to the infecting  
220 strain (**Figure 3b**). Specifically, 433 murine genes are activated upon infection by the ear isolate  
221 9-47-Ear (FC >1.5,  $p < 0.05$ ), while 787 genes are activated by infection with the blood isolate  
222 4559-Blood (FC >1.5,  $p < 0.05$ ). Of the 9-47-Ear upregulated murine genes, only 37% were  
223 protein-coding genes, with the majority encoding pseudogenes and small RNA features. On the  
224 other hand, of the 787 4559-upregulated murine genes, 80% were protein-coding genes, while  
225 the rest encoded small RNA features. The 4559-upregulated genes include genes encoding  
226 proteins involved in multiple pathways such as general metabolism, peroxisome proliferator-  
227 activated receptor (PPAR) signaling, steroid hormone biosynthesis and cAMP signaling.  
228 Although both pneumococcal strains belong to the same capsular serotype and multi-locus  
229 sequence type (Amin et al., 2015), our data strongly suggest wildly diverging isolate-specific  
230 host responses during early infection.

231 In addition, *rafR* swap in the ear isolate background (9-47M) expressing the G249 *rafR*  
232 allele activates 271 murine genes (FC >1.5,  $p < 0.05$ ), while it represses 479 genes. The G249

233 *rafR*-activated genes include those involved in the Wnt signalling pathway (*Fzd2*, *Lgr6*, *Rspo1*,  
234 *Sost*, *Sox17*, *Wnt3a*, *Wnt7a*) and general calcium signalling pathway (*Adra1a*, *Adra1b*, *Adrb3*,  
235 *Cckar*, *Grin2c*, *P2rx6*, *Tacr1*, *Tacr2*). Conversely, 52% of the G249 *rafR*-repressed genes in  
236 lungs infected with 9-47M encode RNA features and 18 chemokines, chemokine ligands,  
237 interferons and interleukins. On the other hand, *rafR* swap in the blood isolate background  
238 (4559M) expressing the D249 *rafR* allele activates 328 murine genes (FC >1.5,  $p < 0.05$ ), and  
239 represses 472 genes. 73% of the D249 *rafR*-activated murine genes encode RNA features and  
240 33 encode histone proteins. The activation of these histone proteins suggests a massive  
241 reorganization of gene regulation with numerous potential downstream impacts. In contrast,  
242 D249 *rafR*-repressed genes include genes encoding calmodulins (*Calm4*, *Calm13* and *Camk2a*)  
243 and phospholipases A2 (*Pla2g4b*, *Pla2g4d* and *Pla2g4f*).

244 Moreover, there are only 132 differentially expressed host genes (FC >1.5,  $p < 0.05$ ), in  
245 response to wild type 9-47-Ear compared to the response to strain 4559M (both having the  
246 D249 *rafR* allele), with 38 genes (FC >1.5,  $p < 0.05$ ), upregulated in strain 9-47-Ear and 94  
247 genes in strain 4559M. Fascinatingly, the D249 *rafR* allele (strains 9-47-Ear and 4559M) is  
248 associated with a significant upregulation of RNA features, including antisense, intronic, long  
249 intergenic non-coding RNAs (lincRNAs) and micro RNAs (miRNAs). The resulting abundance  
250 of RNA species in murine cells upon pneumococcal infection has the potential for even more  
251 widespread transcriptional rewiring and fine-tuning of gene products later in the infection.

252 A quantified functional enrichment showed that certain gene functions are enriched in  
253 the murine response to pneumococcal strains. In particular, cytokine-cytokine receptor  
254 interaction is enriched in differentially expressed host genes because of *rafR* swap in the ear  
255 isolate background (**Figure 3c**, *comparison A*, 9-47-Ear vs. 9-47M,  $p = 9.5 \times 10^{-4}$ ). Concurrently,  
256 the function is enriched in differentially expressed genes between mice infected with strain 9-  
257 47M and those infected with strain 4559-Blood (*comparison D*,  $p = 1.8 \times 10^{-4}$ ). Since both  
258 strains harbor the G249 *rafR* allele, the differentially expressed genes encoding for cytokines  
259 and cytokine receptors are most likely attributable to unrelated genetic differences between the  
260 clinical isolates. Interestingly, this function is not enriched in differentially expressed genes

261 between the *rafR* swap in the blood isolate background (4559M) and the wild type ear isolate  
262 (9-47-Ear, *comparison C*), both of which have the D249 *rafR* allele. Genes encoding chemokine  
263 ligands (*Cxcl2*, *Cxcl3*, *Cxcl10* and *Ccl20*), interleukin 17F (*Il17f*), interferon beta (*Ifnb1*) and a  
264 receptor of TNF (*Tnfrsf18*) are the common differentially expressed genes in lungs of mice  
265 infected with 9-47-Ear, 9-47M and 4559-Blood, with ascending expression from responses to  
266 9-47M, 9-47-Ear and 4559-Blood. Other genes encoding chemokine ligands (*Ccl3*, *Ccl4*,  
267 *Ccl17*, *Ccl24*, *Cxcl5*, *Cxcl11* and *Xcl1*), interleukins (*Il1rn* and *Il13ra2*) and interferon gamma  
268 (*Ifng*) are more highly expressed in the ear isolate-infected lung (9-47-Ear) than in lungs  
269 infected by the *rafR* swap ear isolate (9-47M). Finally, genes encoding chemokine receptors  
270 (*Ccr1* and *Ccr6*), interleukin receptors (*Il1r2*, *Il10ra*, *Il17a*, *Il18rap*, *Il20ra*, *Il20rb*, *Il22* and  
271 *Il23r*), and interleukins (*Il1f5*, *Il1f6*, *Il1f8* and *Il6*) are more highly expressed in lungs infected  
272 by the blood isolate (4559-Blood) compared to the *rafR* swap in the ear isolate background (9-  
273 47M).

274 Interleukin 17, as part of the cytokine response, activates multitudes of downstream  
275 targets in defense against infectious agents (Onishi and Gaffen, 2010), and thus plays a central  
276 role in host response against pneumococcal infection. Here, we observe the same pattern of  
277 diverging activation among murine response to the pneumococcal strains (**Figure 3d**), with IL-  
278 17 associated genes being enriched in differentially expressed genes among the host  
279 transcriptional response to the *rafR* swap in the ear isolate background (*comparison A*, 9-47-  
280 Ear vs. 9-47M,  $p = 9.5 \times 10^{-4}$ ). These genes are also enriched amongst the host response to  
281 pneumococcal strains with the G249 *rafR* allele (*comparison D*, 9-47M vs. 4559-Blood,  $p =$   
282  $7.5 \times 10^{-4}$ ) and to the *rafR* swap cognates (*comparison E*, 9-47M vs. 4559M,  $p = 0.022$ ).  
283 However, there was no enrichment of IL-17 associated genes amongst the host response to  
284 pneumococcal strains with D249 *rafR* allele (*comparison C*, 9-47-Ear vs. 4559M). Common  
285 differentially expressed genes of this function include genes encoding interleukin 17F (*Il17f*)  
286 and chemokine ligands (*Cxcl2*, *Cxcl3* and *Ccl20*), with ascending expression level of response  
287 to 9-47M, 9-47-Ear and 4559-Blood. Specifically, the products of these genes regulate the  
288 recruitment of neutrophils and activate immune responses to extracellular pathogens.

289 In addition to the above, necroptosis, a programmed cell death, is almost significantly  
290 enriched ( $p = 0.07$ ) in differentially expressed murine genes because of the *rafR* swap in the  
291 blood isolate background (**Figure 3e**, comparison *F*, 4559-Blood vs. 4559M). Genes encoding  
292 for histone cluster 2 (*Hist2h2ac*, *Hist2h2aa1*, *Hist2h2aa2* and *H2afx*) are more highly  
293 expressed in murine lungs infected with the blood isolate (4559-Blood), while those encoding  
294 phospholipases A2 (*Pla2g4b*, *Pla2g4f* and *Pla2g4d*) and a subunit of calcium/calmodulin-  
295 dependent protein kinase II (*Camk2a*) are more highly expressed in the transcriptional response  
296 to the *rafR* swap in the blood isolate background (4559M).

297

### 298 **Validation of Host/Pathogen Transcriptomics**

299 To validate the findings from the Dual RNA-seq, quantitative real time RT-PCR was performed  
300 on the RNA samples from the lungs 6 h post-infection. 19 pneumococcal and 18 murine genes  
301 were chosen for this validation, with the primers used listed in **Table 2**. Log<sub>2</sub> FCs were  
302 compared between the Dual RNA-seq and the qRT-PCR datasets for 9-47-Ear vs 9-47M, 9-47-  
303 Ear vs 4559-Blood, 9-47M vs 4559M and 4559-Blood vs 4559M, for each gene, totalling 76  
304 pneumococcal and 72 murine comparisons. A high degree of correlation was observed for both  
305 pneumococcal ( $R^2 > 0.81$ , Pearson) and murine genes ( $R^2 > 0.73$ , Pearson) (**Figure 4**).

306

### 307 **Immune Cell Subsets Present in Infected Lung Tissue**

308 The host RNA-seq data represent the pooled transcriptional responses of all cell types present  
309 in the lungs at the time of RNA extraction. Thus, at least some of the transcriptomic differences  
310 may be attributable to alterations in the relative abundance of given cell types, for example by  
311 differential recruitment of immune cell subsets to the site of infection. Accordingly, flow  
312 cytometry was used to quantify immune cell subsets present in lung tissue 6 h after infection  
313 with either 9-47-Ear, 4559-Blood, 9-47M or 4559M. The surface marker staining panel used  
314 (**Table 2**) allowed the identification and enumeration of natural killer (NK) cells, neutrophils,  
315 eosinophils, inflammatory monocytes (iMono), resident monocytes (rMono), alveolar

316 macrophages (AM $\Phi$ ), interstitial macrophages (iM $\Phi$ ), CD11b-negative dendritic cells  
317 (CD11b-DC), CD11b-positive dendritic cells (CD11b+ DC), T cells and B cells (Yu et al.,  
318 2016). Of these, neutrophils, by far the most abundant cell type, were present in significantly  
319 higher numbers in murine lungs infected with 9-47-Ear (vs 4559-Blood,  $p < 0.01$ ; vs 9-47M,  $p$   
320  $< 0.05$ ) and 4559M (vs 4559-Blood,  $p < 0.05$ ) (**Figure 5**), both of which have the D249 *rafR*  
321 allele. NK cells were also found to be significantly higher in lungs infected with 9-47-Ear (vs  
322 4559-Blood,  $p < 0.01$  and vs 9-47M,  $p < 0.05$ ), while eosinophils were raised in 4559M infected  
323 lungs (vs 4559-Blood,  $p < 0.05$ ) (**Figure 5**).

324

### 325 **Impact of Neutrophil Depletion and IL-17A Neutralization on Pneumococcal Persistence** 326 **in Murine Lungs**

327 As shown above, neutrophils were more abundant in murine lungs infected with 9-47-Ear and  
328 4559M, the strains containing the D249 *rafR* allele that are cleared from the lungs by 24h. This  
329 suggests that the recruitment and presence of neutrophils is crucial for bacterial clearance from  
330 the lung and differential neutrophil recruitment might be the underlying mechanism for the  
331 observed RafR-dependent tropism. To test this, we investigated the importance of neutrophils  
332 for persistence of pneumococci in the lungs in the murine IN challenge model. Injection of anti-  
333 mouse Ly6G antibody was used to deplete neutrophils in 32 mice, alongside an isotype control  
334 group treated with rat IgG2a. Neutrophil depletion was confirmed in the blood prior to  
335 challenge, with a 76.35% decrease in neutrophils seen in the anti-mouse ly6G treated mice,  
336 relative to the isotype control treated group ( $p < 0.0001$ ) (**Figure 6A**). Mice were then  
337 challenged with  $10^8$  CFU of each strain, for both treatment groups. Bacterial loads were  
338 quantified in the nasopharynx and lungs 24 h post-challenge. No significant differences in  
339 bacterial numbers in the nasopharynx were seen between strains within each treatment group  
340 (**Figure 6B**). Also, for both treatments, the numbers of bacteria in the lungs infected with 4559-  
341 Blood and 9-47M were significantly higher than 9-47-Ear and 4559 (**Figure 6C**), which is  
342 consistent with our previous findings (Minhas et al., 2019). However, the anti-Ly6G-treated  
343 groups showed significantly higher lung bacterial loads compared to their respective isotype

344 controls: 4559-Blood anti-Ly6G vs 4559-Blood control ( $p < 0.001$ ), 947-Blood anti-Ly6G vs  
345 947-Blood control ( $p < 0.01$ ), 4559M anti-Ly6G vs 4559M control ( $p < 0.01$ ) and 947M anti-  
346 Ly6G vs 947M control ( $p < 0.05$ ) (**Figure 6C**). Importantly, the lung bacterial loads of anti-  
347 Ly6G-treated 9-47-Ear and 4559M groups were not significantly different to the isotype  
348 control-treated 4559-Blood group (**Figure 6B**). Thus, restriction of neutrophil infiltration into  
349 the lungs by depleting circulating neutrophils in mice challenged with the strains expressing the  
350 D249 *rafR* allele resulted in enhanced lung bacterial loads at 24 h similar to that seen in  
351 untreated mice challenged with the strains expressing the G249 *rafR* allele.

352         Given the known involvement of IL-17 in neutrophil recruitment into the lungs after  
353 infection (Lindén et al., 2005; McCarthy et al., 2014; Ritchie et al., 2018; Stoppelenburg et al.,  
354 2013), we also investigated the in vivo significance of the *rafR*-mediated differential expression  
355 of IL-17-associated genes between the various *S. pneumoniae* strains described above. Groups  
356 of mice were injected with anti-mouse IL-17A antibody, or a control murine IgG1 antibody,  
357 before and after pneumococcal challenge. Bacterial loads were quantified in the nasopharynx  
358 and lungs 24 h post-challenge. Again, no significant differences between strains in bacterial  
359 numbers in the nasopharynx were seen within each treatment group (**Figure 6D**). However,  
360 similar to the results obtained using anti-Ly6G, groups treated with anti-IL-17A showed  
361 significantly higher bacterial numbers in the lungs compared to their respective isotype  
362 controls; 4559-Blood anti-IL-17A vs 4559-Blood control ( $p < 0.05$ ); 947-Blood anti-IL-17A  
363 vs 947-Blood control ( $p < 0.05$ ); 4559M anti-IL-17A vs 4559M control ( $p < 0.05$ ); and 947M  
364 anti-IL-17A vs 947M control ( $p < 0.01$ ) (**Figure 6E**). Nevertheless, the impact of anti-IL-17  
365 treatment on lung bacterial loads was not quite as dramatic as that of anti-Ly6G, as the number  
366 of bacteria in the lungs of anti-IL-17A-treated 9-47-Ear and 4559M groups remained  
367 significantly lower relative to the isotype control treated 4559-Blood group (both  $p < 0.05$ )  
368 (**Figure 6E**). Together, these results show that pneumococcal strains carrying the D249 *rafR*  
369 allele cause a rapid influx of neutrophils, partly controlled by IL-17 expression in the host,  
370 leading to clearance from the lung, while the G249 *rafR* strains manage to remain ‘stealthy’ and  
371 hence can persist.

372

### 373 **Conclusions**

374 In this study, we have used a dual RNA-seq approach, validated by qRT-PCR, to elucidate the  
375 complex interspecies interactions between murine lung cells and infecting *S. pneumoniae* blood  
376 and ear isolates that are closely related (same capsular serotype and ST type), but exhibit distinct  
377 virulence phenotypes in accordance with their original clinical isolation site. These differences  
378 are largely, but not completely, driven by a D249G SNP in the raffinose pathway transcriptional  
379 regulator gene *rafR*, which extensively impacts the bacterial transcriptome in the lung  
380 environment. The SNP affects expression of genes encoding multiple transmembrane  
381 transporters, including those for various sugars, and fine-tunes pneumococcal carbohydrate  
382 metabolism. This indicates that the differential expression of sugar catabolism pathways  
383 provides specific advantages in distinct host niches, implying differential niche-specific  
384 availability of one carbohydrate source versus another. Free sugars are in low abundance in the  
385 upper respiratory tract, but *S. pneumoniae* expresses a range of surface-associated  
386 exoglycosidases enabling it to scavenge constituent sugars (including galactose, *N*-  
387 acetylglucosamine, sialic acid and mannose) from complex host glycans present in respiratory  
388 secretions and on the epithelial surface (King et al., 2006; Shelburne et al., 2008; Buckwalter  
389 and King, 2012; Paixão et al., 2015; Robb et al., 2017). On the other hand, glucose is readily  
390 available in the blood and also in inflamed tissues, implying a marked alteration in the  
391 availability of this preferred carbohydrate source as invasive disease progresses (Philips et al.,  
392 2003). All these variations, and the downstream consequences thereof, are ultimately sensed by  
393 host cells, including epithelial and immune cells, resulting in the observed divergence of host  
394 response to the various strains, particularly with respect to expression of genes encoding  
395 cytokine and chemokine ligands and receptors, as well as those associated with programmed  
396 cell death.

397 Examination of the nature of the host response has provided important clues regarding  
398 the mechanism whereby the *rafR* SNP impacts virulence phenotype. By way of example, the  
399 dual RNA-seq data showed that expression of IL-17 related genes was enriched in mice infected



400 with 9-47-Ear and 4559M, the strains that express the D249 *rafR* allele and which are cleared  
401 from the lungs by 24 h post-challenge. It is well known that IL-17 drives neutrophil recruitment  
402 into the lungs after infection (Lindén et al., 2005; McCarthy et al., 2014; Ritchie et al., 2018;  
403 Stoppelenburg et al., 2013). Additionally, neutrophil extravasation genes were shown to be  
404 upregulated in murine lungs 48 h post pneumococcal challenge (Ritchie and Evans, 2019).  
405 Indeed, we have shown here that neutrophils were present in the lungs 6 h post challenge at  
406 significantly higher numbers in mice infected with 9-47-Ear and 4559M compared with the  
407 strains expressing the G249 *rafR* allele (**Figure 5**), as predicted by the dual RNA-seq data.  
408 Moreover, we went on to show that neutrophil depletion by treatment with anti-Ly6G increased  
409 bacterial numbers in the lungs of mice, relative to the isotype controls. Strikingly,  
410 pneumococcal numbers in the lungs of anti-Ly6G treated mice infected with 9-47-Ear and  
411 4559M were not significantly different to that for isotype control-treated 4559-Blood-infected  
412 mice (**Figure 6C**). In vivo neutralization of IL-17A also resulted in an increase in bacterial  
413 loads in the lungs of mice, relative to the isotype controls, for all challenge strains (**Figure 6E**),  
414 although not to the same extent as seen with for neutrophil-depleted mice (**Figure 6C**). The  
415 difference between the impact of IL-17A neutralization vs neutrophil depletion is likely due to  
416 the action of alternative neutrophil recruitment pathways (Craig et al., 2009; Peñaloza et al.,  
417 2015). Our findings demonstrate that the *rafR* SNP examined in this study has a wide spread  
418 effect on both the bacterial and host transcriptomes, with the strains expressing the G249 allele  
419 triggering a strong pro-inflammatory IL-17 response in the lungs post-infection. This response  
420 leads to an influx of neutrophils to the lungs, resulting in the clearance of bacteria. Conversely,  
421 expression of the D249 *rafR* allele results in a more subdued IL-17 host response, allowing for  
422 bacterial persistence in the lungs. Thus, our findings clearly indicate that modulation of  
423 neutrophil recruitment during the early stage of infection plays a key role in the capacity of a  
424 given *S. pneumoniae* strain to persist in the lungs, and the nature of disease ultimately caused  
425 by it.

426 Our previous studies have shown that in spite of early clearance from the lung, strains  
427 9-47 Ear and 4559M, expressing the G249 *rafR* allele, have an enhanced capacity to spread to

428 and/or proliferate in the ear and brain compartments (Amin et al., 2015; Minhas et al., 2019). It  
429 is not known whether differential carbohydrate metabolism better adapts these strains to  
430 available carbohydrate sources in these niches, or whether altered host pro-inflammatory  
431 responses contribute to ascension of the Eustachian tube or penetration of the blood-brain  
432 barrier. Unfortunately, the total numbers of pneumococci present in these niches are too low  
433 for pathogen-host transcriptomic analyses using available technologies.

434 Intra-species variation in virulence phenotype is a common feature of pathogenic  
435 microorganisms, which by nature are genetically diverse. *S. pneumoniae* is an exemplar of such  
436 diversity comprising at least 98 capsular serotypes superimposed on over 12,000 MLST types,  
437 and with a core genome that accounts for only 70% of genes (Weiser et al., 2018). Nevertheless,  
438 stark differences in pathogenic profile can result from the smallest of genetic differences  
439 between strains, as exemplified by the profound impact of a single SNP on both bacterial and  
440 host transcriptomes reported in this study.

441

## 442 **ACKNOWLEDGEMENTS**

443 We thank V Benes (GeneCore, EMBL, Heidelberg) for his continuing support in library  
444 preparation and sequencing. We would like to acknowledge the Center for Information  
445 Technology of the University of Groningen for their support and for providing access to the  
446 Peregrine high-performance computing cluster. We would also like to thank Timona Tyllis and  
447 Todd Norton for their assistance in acquiring the flow cytometry samples, as well Alexandra  
448 Tikhomirova for her assistance with the murine experiments. This work was supported by the  
449 Swiss National Science Foundation (SNSF) (project grant 31003A\_172861) to J.W.V., a  
450 National Health and Medical Research Council (NHMRC) Program Grant 1071659 to J.C.P.  
451 and a University of Adelaide Beacon Fellowship to C.T. The funders had no role in study  
452 design, data collection and interpretation, or the decision to submit the work for publication.

453

## 454 **AUTHOR CONTRIBUTIONS**

455 Conceptualization: V.M., J.C.P., J.W.V. and C.T.; Methodology: V.M., R.A., J.W.V. and C.T.;

456 Formal analysis: V.M., R.A., L.J.M., I.C., S.R.M., J.C.P., J.W.V. and C.T.; Investigation: V.M.,

457 R.A., H.W., S.C.D., K.T.M., and C.T.; Writing – original draft: V.M., R.A., J.C.P., J.W.V. and

458 C.T.; Writing – review and editing: all authors; Supervision: J.C.P., J.W.V., and C.T.; Funding

459 acquisition: J.C.P., J.W.V., and C.T.

460

## 461 **DECLARATION OF INTERESTS**

462 The authors declare no competing interests.

463

## 464 **MATERIALS AND METHODS**

### 465 **Bacterial Strains and Growth Conditions**

466 *S. pneumoniae* strains used in this study are listed in the (**Table 1**). Cells were routinely grown

467 in serum broth (SB) as required. Bacteria were plated on Columbia agar supplemented with 5%

468 (vol/vol) horse blood (BA) and incubated at 37°C in 5% CO<sub>2</sub> overnight.

469

470 **Table 1.** Resources Table, describing bacterial strains, antibodies, chemicals and commercial

471 assays used in this study.

| <b>Bacterial Strains</b>                                                                                                                                         | <b>Source</b>        | <b>Identifier</b> |
|------------------------------------------------------------------------------------------------------------------------------------------------------------------|----------------------|-------------------|
| <i>Streptococcus pneumoniae</i> : Clinical blood isolate capsular serotype 14, Multi Locus Sequence Type 15: 4559-Blood                                          | Minhas <i>et al.</i> | N/A               |
| <i>Streptococcus pneumoniae</i> : Clinical isolate ear capsular serotype 14, Multi Locus Sequence Type 15: 9-47-Ear                                              | Minhas <i>et al.</i> | N/A               |
| <i>Streptococcus pneumoniae</i> : Clinical isolate ear capsular serotype 14, Multi Locus Sequence Type 15: 4559M (4559-Blood containing <i>rafR</i> of 9-47-Ear) | Minhas <i>et al.</i> | N/A               |
| <i>Streptococcus pneumoniae</i> : Clinical isolate ear capsular serotype 14, Multi Locus Sequence Type 15: 9-47M (947 containing <i>rafR</i> of 4559-Blood)      | Minhas <i>et al.</i> | N/A               |
| <b>Antibodies</b>                                                                                                                                                | <b>Source</b>        | <b>Identifier</b> |

|                                                          |                                             |                                 |
|----------------------------------------------------------|---------------------------------------------|---------------------------------|
| Anti-mouse/human CD11b-PE (clone M1/70)                  | BioLegend                                   | Cat# 101208, RRID: AB_312791    |
| Anti-mouse CD11c-BV786 (clone HL3)                       | BD Biosciences                              | Cat# 563735, RRID: AB_2738394   |
| Anti-mouse CD24-BV711 (clone M1/69)                      | BD Biosciences                              | Cat# 563450, RRID: AB_2738213   |
| Anti-mouse CD45-FITC (clone 30-F11)                      | BioLegend                                   | Cat# 103107, RRID: AB_312972    |
| Anti-mouse CD64-BV421 (clone X54-5/7.1)                  | BioLegend                                   | Cat# 139309, RRID: AB_2562694   |
| Anti-mouse Ly6C-PerCP/Cy5.5 (clone HK1.4)                | BioLegend                                   | Cat# 128011, RRID: AB_1659242   |
| Anti-mouse Ly6G-BUV395 (clone 1A8)                       | BD Biosciences                              | Cat# 563978, RRID: AB_2716852   |
| Anti-mouse I-A/I-E-BV650 (clone M5/114.15.2)             | BD Biosciences                              | Cat# 563415, RRID: AB_2738192   |
| Anti-mouse Ly6G (clone 1A8)                              | Bio X Cell                                  | Cat# BE0075-1, RRID: AB_1107721 |
| Rat IgG2A Isotype Control (clone 54447)                  | R and D Systems                             | Cat# MAB006, RRID: AB_357349    |
| Anti-mouse Ly-6G, Ly-6C-Biotin (clone RB6-8C5)           | BD Biosciences                              | Cat# 553125, RRID: AB_394641    |
| Anti-mouse IL-17A (clone 17F3)                           | Bio X Cell                                  | Cat# BE0173, RRID: AB_10950102  |
| Mouse IgG1 Isotype Control (clone MOPC-21)               | Bio X Cell                                  | Cat# BE0083, RRID: AB_1107784   |
| <b>Chemicals</b>                                         | <b>Source</b>                               | <b>Identifier</b>               |
| Zombie NIR™ Fixable Viability Kit                        | BioLegend                                   | Cat# 423105                     |
| BV421 Streptavidin                                       | BD Biosciences                              | Cat# 563259                     |
| Horse serum, heat inactivated                            | Thermo Fisher Scientific                    | Cat# <a href="#">26050088</a>   |
| LAB LEMCO Nutrient Broth + 10% horse serum (serum broth) | Adelaide University Technical Services Unit | Custom Synthesis                |
| Columbia blood agar base (dehydrated)                    | Thermo Scientific Oxoid                     | Cat# CM0331T                    |
| Defibrinated horse blood                                 | Australian Ethical Biologicals              | Cat# PDHB500                    |
| <i>Pentobarbital Sodium Anaesthetic Injection</i>        | <i>Illium</i>                               | N/A                             |
| Acid-Phenol:Chloroform, pH 4.5 (with IAA, 125:24:1)      | Thermo Fisher Scientific                    | Cat# AM9722                     |
| SuperScript® III Platinum® One-Step qRT-PCR Kit          | Thermo Fisher Scientific                    | Cat# 11736059                   |
| TRIzol® Reagent                                          | Thermo Fisher Scientific                    | Cat# 15596026                   |
| DMEM + HEPES                                             | Thermo Fisher Scientific                    | Cat # 12430054                  |

|                                                     |               |                   |
|-----------------------------------------------------|---------------|-------------------|
| Fetal Bovine Serum                                  | Corning       | Cat# 35076CV      |
| Collagenase from <i>Clostridium histolyticum</i>    | Sigma-Aldrich | Cat# C9891        |
| Dnase I                                             | Sigma-Aldrich | Cat# 11284932001  |
| Sodium azide solution                               | Sigma-Aldrich | Cat# 08591        |
| Paraformaldehyde                                    | Sigma-Aldrich | Cat# P6148        |
| Bovine Serum Albumin Fraction V                     | Sigma-Aldrich | Cat# 10735        |
| 10x RBC lysis buffer                                | eBioscience   | Cat# 00430054     |
| <b>Commercial Assays</b>                            | <b>Source</b> | <b>Identifier</b> |
| RNeasy Mini Kit                                     | Qiagen        | Cat# 74106        |
| Ribo-Zero Murine rRNA depletion kit                 | Illumina      | N/A               |
| Ribo-Zero Gram positive bacteria rRNA depletion kit | Illumina      | N/A               |
| Stranded cDNA library preparation kit               | Illumina      | N/A               |

472

473

#### 474 **Intranasal Challenge of Mice and Extraction of RNA**

475 Animal experiments were approved by the University of Adelaide Animal Ethics Committee.  
476 Groups of 12 outbred 6-week-old female Swiss (CD-1) mice (48 in total), were anesthetized by  
477 intraperitoneal injection of pentobarbital sodium (Nembutal) and challenged intranasally (IN)  
478 with 50  $\mu$ l of bacterial suspension containing approximately  $1 \times 10^8$  CFU in SB of 4559-Blood,  
479 9-47-Ear, 4559M or 9-47M. The challenge dose was confirmed retrospectively by serial  
480 dilution and plating on BA. Mice were euthanized by CO<sub>2</sub> asphyxiation at 6 h and lungs placed  
481 in 1 ml TRIzol (Thermo Fisher). RNA was then extracted using acid-phenol-chloroform-  
482 isoamyl alcohol (125:21:1; pH 4.5; Ambion) and purified using the RNeasy minikit (Qiagen).  
483 For subsequent dual RNA-seq analyses, there were three replicates per strain, with each  
484 replicate derived from the lungs of four mice.

485

#### 486 **RNA Library Preparation and Sequencing**

487 RNA quality was checked using chip-based capillary electrophoresis. Samples were then  
488 simultaneously depleted from murine and pneumococcal ribosomal RNAs by dual rRNA-  
489 depletion as previously described (Aprianto et al., 2016). Stranded cDNA library preparation  
490 was performed according to the prescribed protocol (Illumina, US). Sequencing was performed  
491 for twelve samples in one lane of Illumina NextSeq 500, High Output Flowcell in 85 single end

492 mode. Libraries were demultiplexed and analyzed further. Raw libraries are accessible at  
493 <https://www.ncbi.nlm.nih.gov/geo/> with the accession number GSE123982.

494

## 495 **Sequence Data Analysis**

496 Quality of raw libraries was checked (Andrews and Babraham Bioinformatics, 2010) (FastQC  
497 v0.11.8, Babraham Bioinformatics, UK). In order to improve the quality of alignment, we  
498 trimmed the reads (Bolger et al., 2014) using the following criteria: (i) removal of adapter  
499 sequence, if any, based on TruSeq3-SE library, (ii) removal of low quality leading and trailing  
500 nucleotides, (iii) a five-nucleotide sliding window was created for surviving reads, in which the  
501 average quality score must be above 20 and (iv) minimum remaining length must be above 50  
502 (Trimmomatic v0.38). The quality of trimmed reads were confirmed using FastQC (Andrews  
503 and Babraham Bioinformatics, 2010).

504 As reference genomes, we created chimeric genomes by concatenating the in-house generated  
505 *S. pneumoniae* circular genome into the genome of *Mus musculus* (ENSEMBL, release 94,  
506 downloaded 9 October 2018). The corresponding annotation file was downloaded at the same  
507 time. The chimeric genome containing genome of strain 9-47-Ear was used as reference to align  
508 libraries from lung infected by strain 9-47-Ear (and its corresponding swap mutant) while the  
509 4559-Blood chimeric genome was used to align 4559-Blood libraries. Notably, genome of *S.*  
510 *pneumoniae* isolate 4559-Blood has a plasmid. Alignment was performed by RNA-  
511 STAR (v2.6.0a) (Dobin et al., 2013) with the following options: (i) alignIntronMax 1 and (ii)  
512 sjdbOverhang 84. The aligned reads were summarized (featureCount v1.6.3) according to  
513 the chimeric annotation file in stranded, multimapping (-M), fractionized (--fraction) and  
514 overlapping (-O) modes (Liao et al., 2014). In order to compare gene expression between strains  
515 from ear and blood isolate backgrounds, we prepared a common pneumococcal annotation file  
516 using Mauve v20150226 (Darling et al., 2004). Common genes between 9-47-Ear and 4559-  
517 Blood were defined as having common coverage at least 90% and identity at least 90%. This  
518 single-pass alignment was selected onto chimeric genome was selected to minimize false

519 discovery rate. However, due to this approach, we have to adjust the summarizing process,  
520 taking into account the overlapping nature of bacterial genes and its organization into operon  
521 structures.

522 We then analyzed host and pathogen libraries separately in R (R v3.5.2). Since reads coming  
523 from pneumococcal genes encoding bacterial rRNA dominate the pathogen libraries (average  
524 64.5%, range between 61.4 to 67.3%), we excluded these pneumococcal ribosomal RNA reads  
525 from downstream analysis, but we did not do the same exclusion to reads coming murine  
526 ribosomal RNA genes due to effective rRNA depletion. Differential gene analysis was  
527 performed by DESeq2 v1.22.1 (Love et al., 2014) and genome-wide fold change was calculated  
528 within host and pathogen libraries for every two possible comparisons: strains 9-47-Ear to 9-  
529 47M, strains 9-47-Ear to 4559-Blood, strains 9-47-Ear to 4559M, strains 9-47M to 4559-Blood,  
530 strains 9-47M to 4559M and strains 4559-Blood to 4559M. Value of fold change was set to  
531 zero if the corresponding adjusted p-value (*p*<sub>adj</sub>) is reported to be NA.

532

### 533 **Quantitative Real Time RT-PCR**

534 Differences in levels of gene expression observed in the dual RNA-seq data were validated by  
535 one-step relative quantitative real-time RT-PCR (qRT-PCR) in a Roche LC480 real-time cycler  
536 essentially as previously described (Mahdi et al., 2008). The same RNA that was used for the  
537 dual RNA-seq was used in the RT-PCR validation. 19 pneumococcal genes and 18 murine  
538 genes were chosen for the validation. The specific primers used for the various genes are listed  
539 in **Table 2** and were used at a final concentration of 200 nM per reaction. As an internal control,  
540 primers specific for *gyrA* were employed. Amplification data were analysed using the  
541 comparative critical threshold ( $2^{-CT}$ ) method (Livak and Schmittgen, 2001).

542

543 **Table 2.** Oligonucleotide primers used in this study

| <b>Primer</b>  | <b>Sequence (5' → 3')</b> | <b>Reference</b>     |
|----------------|---------------------------|----------------------|
| <i>rafR</i> F: | CCAGCCATTCGTGATACATA      | Minhas <i>et al.</i> |
| <i>rafR</i> R: | CCTCCAGTGATTCCTAACCA      | Minhas <i>et al.</i> |
| <i>aga</i> F:  | AAGGTCAGAATGGTCCACAG      | Minhas <i>et al.</i> |



|                       |                        |                      |
|-----------------------|------------------------|----------------------|
| <i>aga</i> R:         | GCTGGAAAATCAGCCATAAA   | Minhas <i>et al.</i> |
| <i>rafG</i> F:        | CCTATGGCAGCCTACTCCATC  | Minhas <i>et al.</i> |
| <i>rafG</i> R:        | GGGTCTGTGGAATCGCATAGG  | Minhas <i>et al.</i> |
| <i>rafK</i> F:        | GCTGGTTTACGTTCCAAGAA   | Minhas <i>et al.</i> |
| <i>rafK</i> R:        | GCTGGTTTACGTTCCAAGAA   | Minhas <i>et al.</i> |
| Sp947_00054 F:        | GCAAGACAGACTACGAAGCAG  | This study           |
| Sp947_00054 R:        | TCCTCAATCCCATGAGCTC    | This study           |
| Sp947_00279 F:        | GTGGCACTTGCGAATACTGT   | This study           |
| Sp947_00279 R:        | GGATCAAGTCCGTCAGGAAC   | This study           |
| Sp947_00544 F:        | CTGTTGAGCCTCGTAACTC    | This study           |
| Sp947_00544 R:        | CGTGGAAGGTGGATATTCTC   | This study           |
| Sp947_00675 F:        | CCGTGTTGGTTGAAACCAG    | This study           |
| Sp947_00675 R:        | CTTGACCAGCATCACCAAGG   | This study           |
| Sp947_00841 F:        | GGTTGCGTTGACTGGTAGTT   | This study           |
| Sp947_00841 R:        | CCAATACCAGCTTCTGCTCC   | This study           |
| Sp947_01448 F:        | ACAGCTCCAGCTATGAAGGG   | This study           |
| Sp947_01448 R:        | AGACTGAGCCCCATAAGATG   | This study           |
| Sp947_01582 F:        | GTCAACTGTGCAGGTCTTGC   | This study           |
| Sp947_01582 R:        | GCTCCATCCTGCATATGCAT   | This study           |
| Sp947_01598 F:        | GTTCGATTGCTATCGATGGT   | This study           |
| Sp947_01598 R:        | CATCATATTCTTGGGTAACGC  | This study           |
| Sp947_01629 F:        | CCAGTCCTTGTGAGTCTG     | This study           |
| Sp947_01629 R:        | CGCATCAGACACAACCAACA   | This study           |
| Sp947_01798 F:        | CGAGATATCGCTGCTGAGTA   | This study           |
| Sp947_01798 R:        | CAAACGCTCTGTTCTGGAAC   | This study           |
| Sp947_01920 F:        | TCCATGGATACTCAACTCG    | This study           |
| Sp947_01920 R:        | CTAGAGGCGTCGTATCTCGA   | This study           |
| Sp947_01951 F:        | AATGGTCATTCCAGAAGCAG   | This study           |
| Sp947_01951 R:        | CTTCTTGGATAAGCAGGTGTC  | This study           |
| Sp947_01955 F:        | CCATGCCATGGTAGAGCTTG   | This study           |
| Sp947_01955 R:        | TGGCAGCATCCATTGGAGAC   | This study           |
| Sp947_01982 F:        | AGGCAAGCAGTACAGGCAAC   | This study           |
| Sp947_01982 R:        | GTCCTGCTTGATTTCGACAG   | This study           |
| Sp947_02097 F:        | CATTCTTGCTCCTCTCCAAG   | This study           |
| Sp947_02097 R:        | GATTGATCATGAGACCTGCG   | This study           |
| ENSMUSG00000063021 F: | CTGCTTGCCTCTTCCTGACAT  | This study           |
| ENSMUSG00000063021 R: | ATTGGTCTAGGTGCAATGCTTC | This study           |
| ENSMUSG00000068855 F: | AAGTGACGATCGCACAGGG    | This study           |
| ENSMUSG00000068855 R: | CGTGTTGAGTTTCACTTGCTCT | This study           |
| ENSMUSG00000063954 F: | AACTACGCGGAGCGTGTGG    | This study           |
| ENSMUSG00000063954 R: | CGCGTCTTCTTGTGTGCGC    | This study           |
| ENSMUSG00000034855 F: | TAAACTCATGGCACCGGCAT   | This study           |
| ENSMUSG00000034855 R: | GGCATTGAGCAGCTTTACCC   | This study           |
| ENSMUSG00000048806 F: | GCACTGGGTGGAATGAGACT   | This study           |
| ENSMUSG00000048806 R: | GTGGAGAGCAGTTGAGGACA   | This study           |
| ENSMUSG00000074695 F: | AGCTGCTTGGGCTTCATAAC   | This study           |
| ENSMUSG00000074695 R: | CCCCTGCAATCACCTAATCC   | This study           |
| ENSMUSG00000000157 F: | CACCTGGCTCCTTGGAGAG    | This study           |
| ENSMUSG00000000157 R: | AGCCAAGTGGAATCGTTGT    | This study           |

|                       |                        |            |
|-----------------------|------------------------|------------|
| ENSMUSG00000017300 F: | AGGAACTGGCTGAGTGCTTC   | This study |
| ENSMUSG00000017300 R: | GCTCCATCTGCTCTCAGGTC   | This study |
| ENSMUSG00000030730 F: | CCTCCCTACCTTGATGCCAG   | This study |
| ENSMUSG00000030730 R: | GGAAGGGTCAAGGCTTCAGG   | This study |
| ENSMUSG00000026407 F: | CATGAGGACCTGAGGTGCAG   | This study |
| ENSMUSG00000026407 R: | CTGGTTTGACTCTGCTGGCT   | This study |
| ENSMUSG00000026985 F: | GCCATGTCTTCTCAAAGCAAT  | This study |
| ENSMUSG00000026985 R: | TGAACCCTGTAGTTTCTGGGAG | This study |
| ENSMUSG00000061928 F: | GGCACTGGCATAGCCTCATA   | This study |
| ENSMUSG00000061928 R: | TTCCAGAGACTACCCACCC    | This study |
| ENSMUSG00000063130 F: | CCCTCCACGGGACTTTGTC    | This study |
| ENSMUSG00000063130 R: | CAATGACCCCCAGCTCTACT   | This study |
| ENSMUSG00000030046 F: | GCATGACCCTTTGCTGGTTG   | This study |
| ENSMUSG00000030046 R: | CCAGATCCTGCTCATGGGTG   | This study |
| ENSMUSG00000033765 F: | ACAAGCTCCAACCTCGTCGTC  | This study |
| ENSMUSG00000033765 R: | CTCCAGATGGCACAGCATCC   | This study |
| ENSMUSG00000028001 F: | CTGCACCCGTTTCTAACCT    | This study |
| ENSMUSG00000028001 R: | CACATGGTCAAGTCCCTGCC   | This study |
| ENSMUSG00000033860 F: | TGGAGAGACTCCAGGGATAC   | This study |
| ENSMUSG00000033860 R: | GTTTGTCTGACAGCGCATGA   | This study |
| ENSMUSG00000033831 F: | TGGACAGTCATACAGAACCGT  | This study |
| ENSMUSG00000033831 R: | TTCACTCGCAGTCTTTACCTG  | This study |

544

#### 545 **Flow Cytometry Analysis of Infected Murine Lungs**

546 Groups of 8 outbred 6-week-old female Swiss (CD-1) mice (32 in total) were anesthetized and  
547 challenged with the bacterial suspension as outlined above in the total RNA extraction method.  
548 Mice were euthanized by CO<sub>2</sub> asphyxiation at 6 h, then lungs were finely macerated in 1 mL  
549 prewarmed digestion medium (DMEM + 5% FCS, 10 mM HEPES, 2.5 mM CaCl<sub>2</sub>,  
550 0.2 U mL<sup>-1</sup> penicillin/gentamicin, 1 mg mL<sup>-1</sup> collagenase IA, 30 U mL<sup>-1</sup> DNase) and  
551 incubated at 37°C for 1 h with mixing every 20 min. Single cells were then prepared for  
552 acquisition on a BD LSRFortessa X20 flow cytometer as previously described (David et al.,  
553 2019). The single cell suspensions were stained using antibodies against surface markers listed  
554 in **Table 1**, allowing the enumeration of a number of immune cell subsets, as previously  
555 described (Yu et al., 2016).

556

#### 557 **Neutrophil Depletion and IL-17A Blockade and Bacterial Load Quantification**

558 Groups of 8 outbred 6-week-old female Swiss (CD-1) mice (64 in total) were intraperitoneally  
559 administered with either 350 µg of rat anti-mouse Ly6G or rat IgG2a isotype control antibodies,  
560 one and two days prior to pneumococcal challenge, or 200ug of either monoclonal anti-mouse  
561 IL-17A or mouse IgG1 isotype control antibodies one day prior to, 2 h before and 6 h after  
562 pneumococcal challenge. Mice were also cheek bled on day of challenge for confirmation of  
563 depletion of Ly6G-positive cells via flow cytometry, as previously described (Faget et al.,  
564 2018). Mice were then anesthetized and challenged with the bacterial suspension as outlined  
565 above in the total RNA extraction method, for each treatment group. Mice were euthanized by  
566 CO<sub>2</sub> asphyxiation at 24 h, then nasopharynx and lung tissue samples were harvested and  
567 pneumococci enumerated in tissue homogenates as described previously via serial dilution and  
568 plating on BA containing gentamicin (Trappetti et al., 2011).

569

## 570 **QUANTIFICATION AND STATISTICAL ANALYSIS**

571 For the RNA-seq data, enrichment tests to assess enrichment were performed by the built-in  
572 function, *fisher.test()*. Corresponding *p*-values of the enrichment test were adjusted by  
573 Bonferroni correction. Resultant figures encompass data derived from three replicates per  
574 group, with each replicate derived from lungs of four mice. All other data are presented as  
575 mean ± standard error of mean (SEM) or geometric mean, and were analyzed by two-tailed  
576 unpaired Student's *t*-test, one way ANOVA or Pearson correlation coefficient, using Prism  
577 v8.0d (GraphPad). Statistical significance was defined as  $P < 0.05$ . Data presented in figures  
578 are representative of at least two independent *in vivo* experiments, or at least 3  
579 independent *in vitro* experiments.

580

## 581 **DATA AVAILABILITY**

582 The transcriptomic datasets are available in the GEO repository, accession number GSE123982.

583

## 584 **REFERENCES**

- 585 Amin, Z., Harvey, R.M., Wang, H., Hughes, C.E., Paton, A.W., Paton, J.C., and Trappetti, C. (2015).  
586 Isolation site influences virulence phenotype of serotype 14 *Streptococcus pneumoniae* strains  
587 belonging to multilocus sequence type 15. *Infection and Immunity* 83, 4781–4790.
- 588 Andrews, S., and Babraham Bioinformatics (2010). FastQC: A quality control tool for high throughput  
589 sequence data. Manual.
- 590 Aprianto, R., Slager, J., Holsappel, S., and Veening, J.-W. (2016). Time-resolved dual RNA-seq reveals  
591 extensive rewiring of lung epithelial and pneumococcal transcriptomes during early infection.  
592 *Genome Biol.* 17, 198.
- 593 Bidossi, A., Mulas, L., Decorosi, F., Colomba, L., Ricci, S., Pozzi, G., Deutscher, J., Viti, C., and Oggioni,  
594 M.R. (2012). A functional genomics approach to establish the complement of carbohydrate  
595 transporters in *Streptococcus pneumoniae*. *PLoS ONE* 7, e33320.
- 596 Bolger, A.M., Lohse, M., and Usadel, B. (2014). Trimmomatic: a flexible trimmer for Illumina  
597 sequence data. *Bioinformatics* 30, 2114–2120.
- 598 Buckwalter, C.M., and King, S.J. (2012). Pneumococcal carbohydrate transport: food for thought.  
599 *Trends Microbiol* 20, 517-522.
- 600 Craig, A., Mai, J., Cai, S., and Jeyaseelan, S. (2009). Neutrophil recruitment to the lungs during  
601 bacterial pneumonia. *Infect. Immun.* 77, 568–575.
- 602 Darling, A.C.E., Mau, B., Blattner, F.R., and Perna, N.T. (2004). Mauve: multiple alignment of  
603 conserved genomic sequence with rearrangements. *Genome Res.* 14, 1394–1403.
- 604 David, S.C., Laan, Z., Minhas, V., Chen, A.Y., Davies, J., Hirst, T.R., McColl, S.R., Alsharifi, M., and  
605 Paton, J.C. (2019). Enhanced safety and immunogenicity of a pneumococcal surface antigen A mutant  
606 whole-cell inactivated pneumococcal vaccine. *Immunol. Cell Biol.* 97, 726–739.
- 607 Dobin, A., Davis, C.A., Schlesinger, F., Drenkow, J., Zaleski, C., Jha, S., Batut, P., Chaisson, M., and  
608 Gingeras, T.R. (2013). STAR: ultrafast universal RNA-seq aligner. *Bioinformatics* 29, 15–21.
- 609 Enright, M.C., and Spratt, B.G. (1998). A multilocus sequence typing scheme for *Streptococcus*  
610 *pneumoniae*: identification of clones associated with serious invasive disease. *Microbiology* 144,  
611 3049–3060.
- 612 Faget, J., Boivin, G., Ancey, P.-B., Gkasti, A., Mussard, J., Engblom, C., Pfirschke, C., Vazquez, J.,  
613 Bendriss-Vermare, N., Caux, C., et al. (2018). Efficient and specific Ly6G+ cell depletion: A change in  
614 the current practices toward more relevant functional analyses of neutrophils. *BioRxiv* 498881.
- 615 Kadioglu, A., Weiser, J.N., Paton, J.C., and Andrew, P.W. (2008). The role of *Streptococcus*  
616 *pneumoniae* virulence factors in host respiratory colonization and disease. *Nature Reviews*  
617 *Microbiology* 6, 288–301.
- 618 King, S.J., Hippe, K.R., and Weiser, J.N. (2006). Deglycosylation of human glycoconjugates by the  
619 sequential activities of exoglycosidases expressed by *Streptococcus pneumoniae*. *Mol. Microbiol.* 59,  
620 961-974.
- 621 Liao, Y., Smyth, G.K., and Shi, W. (2014). featureCounts: an efficient general purpose program for  
622 assigning sequence reads to genomic features. *Bioinformatics* 30, 923–930.

- 623 Lindén, A., Laan, M., and Anderson, G.P. (2005). Neutrophils, interleukin-17A and lung disease. *Eur.*  
624 *Resp. J.* *25*, 159–172.
- 625 Livak, K.J., and Schmittgen, T.D. (2001). Analysis of relative gene expression data using real-time  
626 quantitative PCR and the  $2^{-\Delta\Delta C(T)}$  Method. *Methods* *25*, 402–408.
- 627 Love, M.I., Huber, W., and Anders, S. (2014). Moderated estimation of fold change and dispersion for  
628 RNA-seq data with DESeq2. *Genome Biology* *15*, 550.
- 629 Mahdi, L.K., Ogunniyi, A.D., LeMessurier, K.S., and Paton, J.C. (2008). Pneumococcal virulence gene  
630 expression and host cytokine profiles during pathogenesis of invasive disease. *Infect. Immun.* *76*,  
631 646–657.
- 632 McCarthy, M.K., Zhu, L., Procario, M.C., and Weinberg, J.B. (2014). IL-17 contributes to neutrophil  
633 recruitment but not to control of viral replication during acute mouse adenovirus type 1 respiratory  
634 infection. *Virology* *456–457*, 259–267.
- 635 Minhas, V., Harvey, R.M., McAllister, L.J., Seemann, T., Syme, A.E., Baines, S.L., Paton, J.C., and  
636 Trappetti, C. (2019). Capacity to utilize raffinose dictates pneumococcal disease phenotype. *mBio* *10*,  
637 e02596-18.
- 638 Onishi, R.M., and Gaffen, S.L. (2010). Interleukin-17 and its target genes: mechanisms of interleukin-  
639 17 function in disease. *Immunology* *129*, 311–321.
- 640 Paixao, L., Oliveira, J., Verissimo, A., Vinga, S., Lourenco, E.C., Ventura, M.R., Kjos, M., Veening, J.W.,  
641 Fernandes, V.E., Andrew, P.W., Yesilkaya, H., and Neves, A.R. (2015). Host glycan sugar-specific  
642 pathways in *Streptococcus pneumoniae*: galactose as a key sugar in colonisation and infection. *PLoS*  
643 *One* *10*, e0121042.
- 644 Peñaloza, H.F., Nieto, P.A., Muñoz-Durango, N., Salazar-Echegarai, F.J., Torres, J., Parga, M.J., Alvarez-  
645 Lobos, M., Riedel, C.A., Kalergis, A.M., and Bueno, S.M. (2015). Interleukin-10 plays a key role in the  
646 modulation of neutrophils recruitment and lung inflammation during infection by *Streptococcus*  
647 *pneumoniae*. *Immunology* *146*, 100–112.
- 648 Philips, B.J., Meguer, J.X., Redman, J., and Baker, E.H. (2003). Factors determining the appearance of  
649 glucose in upper and lower respiratory tract secretions. *Intensive Care Med.* *29*, 2204-2210.
- 650 Ritchie, N.D., and Evans, T.J. (2019). Dual RNA-seq in *Streptococcus pneumoniae* infection reveals  
651 compartmentalized neutrophil responses in lung and pleural space. *MSystems* *4*, e00216-19.
- 652 Ritchie, N.D., Ritchie, R., Bayes, H.K., Mitchell, T.J., and Evans, T.J. (2018). IL-17 can be protective or  
653 deleterious in murine pneumococcal pneumonia. *PLOS Pathogens* *14*, e1007099.
- 654 Robb, M., Hobbs, J.K., Woodiga, S.A., Shapiro-Ward, S., Suits, M.D., McGregor, N., Brumer, H.,  
655 Yesilkaya, H., King, S.J., and Boraston, A.B. (2017). Molecular characterization of *N*-glycan  
656 degradation and transport in *Streptococcus pneumoniae* and its contribution to virulence. *PLoS*  
657 *Pathog* *13*, e1006090.
- 658 Shelburne, S.A., Davenport, M.T., Keith, D.B., and Musser, J.M. (2008). The role of complex  
659 carbohydrate catabolism in the pathogenesis of invasive streptococci. *Trends Microbiol.* *16*, 318-325.

- 660 Stoppelenburg, A.J., Salimi, V., Hennis, M., Plantinga, M., Veld, R.H. in 't, Walk, J., Meerding, J.,  
661 Coenjaerts, F., Bont, L., and Boes, M. (2013). Local IL-17A potentiates early neutrophil recruitment to  
662 the respiratory tract during severe RSV infection. PLOS ONE 8, e78461.
- 663 van Tonder, A.J., Gladstone, R.A., Lo, S.W., Nahm, M.H., du Plessis, M., Cornick, J., Kwambana-Adams,  
664 B., Madhi, S.A., Hawkins, P.A., Benisty, R., et al. (2019). Putative novel *cps* loci in a large global  
665 collection of pneumococci. Microb Genom 5, doi: 10.1099/mgen.0.000274.
- 666 Trappetti, C., Ogunniyi, A.D., Oggioni, M.R., and Paton, J.C. (2011). Extracellular matrix formation  
667 enhances the ability of *Streptococcus pneumoniae* to cause invasive disease. PLoS One 6, e19844.
- 668 Trappetti, C., Maten, E. van der, Amin, Z., Potter, A.J., Chen, A.Y., Mourik, P.M. van, Lawrence, A.J.,  
669 Paton, A.W., and Paton, J.C. (2013). Site of isolation determines biofilm formation and virulence  
670 phenotypes of *Streptococcus pneumoniae* serotype 3 clinical isolates. Infect. Immun. 81, 505–513.
- 671 Weiser, J.N., Ferreira, D.M., and Paton, J.C. (2018). *Streptococcus pneumoniae*: transmission,  
672 colonization and invasion. Nature Reviews Microbiology 16, 355–367.
- 673 Westermann, A.J., Barquist, L., and Vogel, J. (2017). Resolving host-pathogen interactions by dual  
674 RNA-seq. PLoS Pathog. 13, e1006033.
- 675 Wolf, T., Kämmer, P., Brunke, S., and Linde, J. (2018). Two's company: studying interspecies  
676 relationships with dual RNA-seq. Curr Opin Microbiol 42, 7–12.
- 677 Yu, Y.-R.A., O'Koren, E.G., Hotten, D.F., Kan, M.J., Kopin, D., Nelson, E.R., Que, L., and Gunn, M.D.  
678 (2016). A Protocol for the comprehensive flow cytometric analysis of immune cells in normal and  
679 inflamed murine non-lymphoid tissues. PLoS One 11, e0150606.

680

681

682

683

684

685

686

687

688

689

690

691

692



693

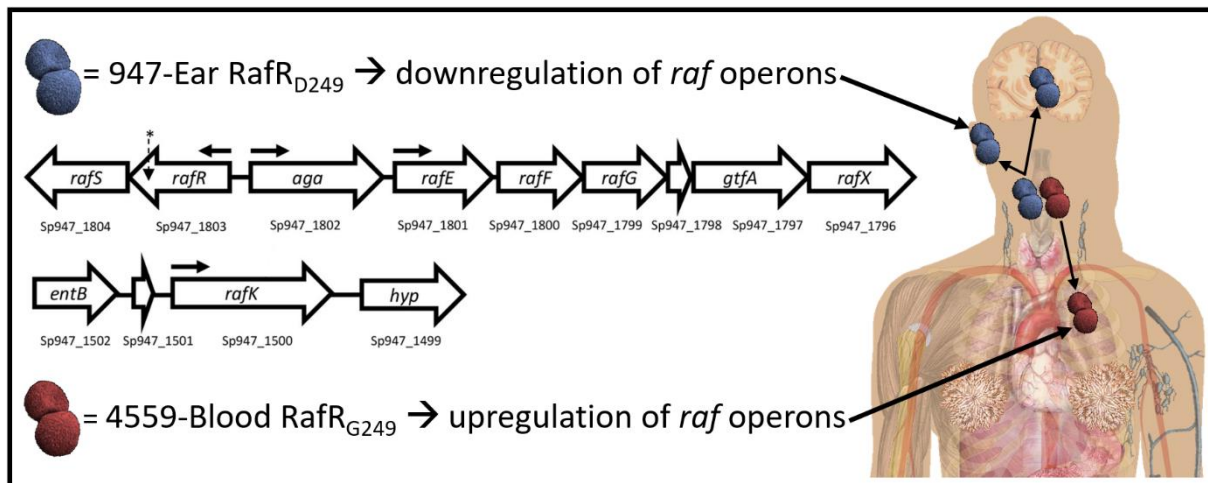

694

695 **Figure 1.** A SNP in *rafR* between the serotype 14 sequence type 15 clonal isolates 4559-Blood  
696 and 947-Ear leads to a non-conservative G249D amino acid substitution in the raffinose  
697 pathway regulator RafR. RafR<sub>G249</sub> results in upregulation of *raf* operons (horizontal arrows  
698 denote transcriptional start sites) in 4559-Blood relative to 947-Ear, favouring persistence in  
699 the lung after intranasal challenge. Lower *raf* pathway expression mediated by RafR<sub>D249</sub>  
700 facilitates clearance of 947-Ear from the lung, but promotes spread to and/or persistence in the  
701 ear and brain. The location of the SNP in *rafR* is indicated by an asterisk (Minhas et al., 2019).

702

703

704

705

706

707

708

709



710

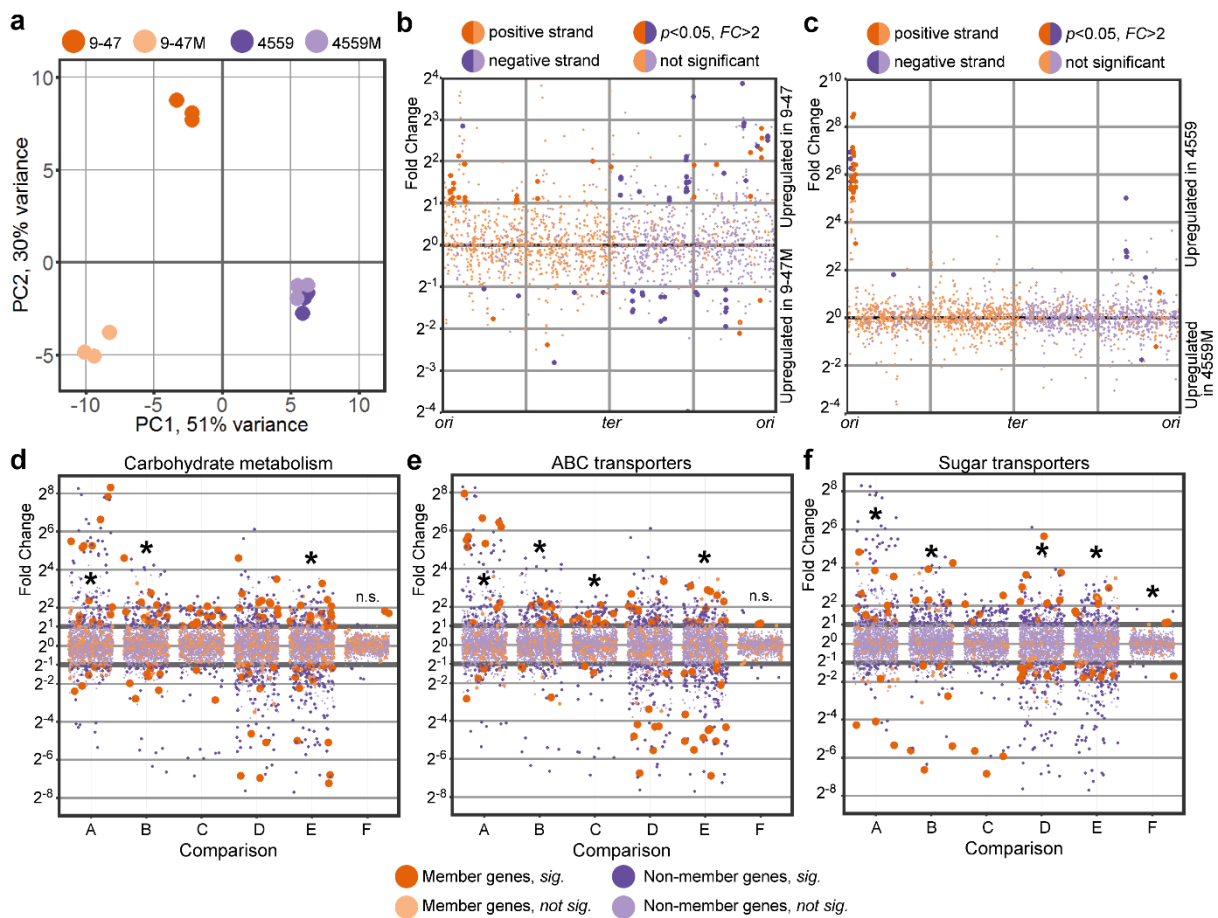

711

712 **Figure 2.** Pathogen transcriptional responses in murine lung. (a). PCA plot showing divergence  
 713 of transcriptional response to lung infection within the ear (9-47-Ear) and blood isolates (4559-  
 714 Blood). *rafR* swap (9-47M) rewires pneumococcal transcriptional response only in the ear  
 715 isolate background but not in the blood isolate. (b). Differential expression due to the *rafR* swap  
 716 in the ear isolate background is spread throughout the pneumococcal genome, while in the blood  
 717 isolate background, differential expression due to the *rafR* swap is limited to a genomic island  
 718 (c). Functional enrichment showed specific function being differentially expressed, including  
 719 carbohydrate metabolism (d), ABC transporters (e) and sugar transporters (F). A: comparison  
 720 of 9-47-Ear to 9-47M; B: 9-47-Ear to 4559-Blood; C: 9-47-Ear to 4559M; D: 9-47M to 4559-  
 721 Blood; E: 9-47M to 4559M and F: 4559-Blood to 4559M. \* denotes statistically significant  
 722 functional enrichment for the indicated strain-strain comparison.

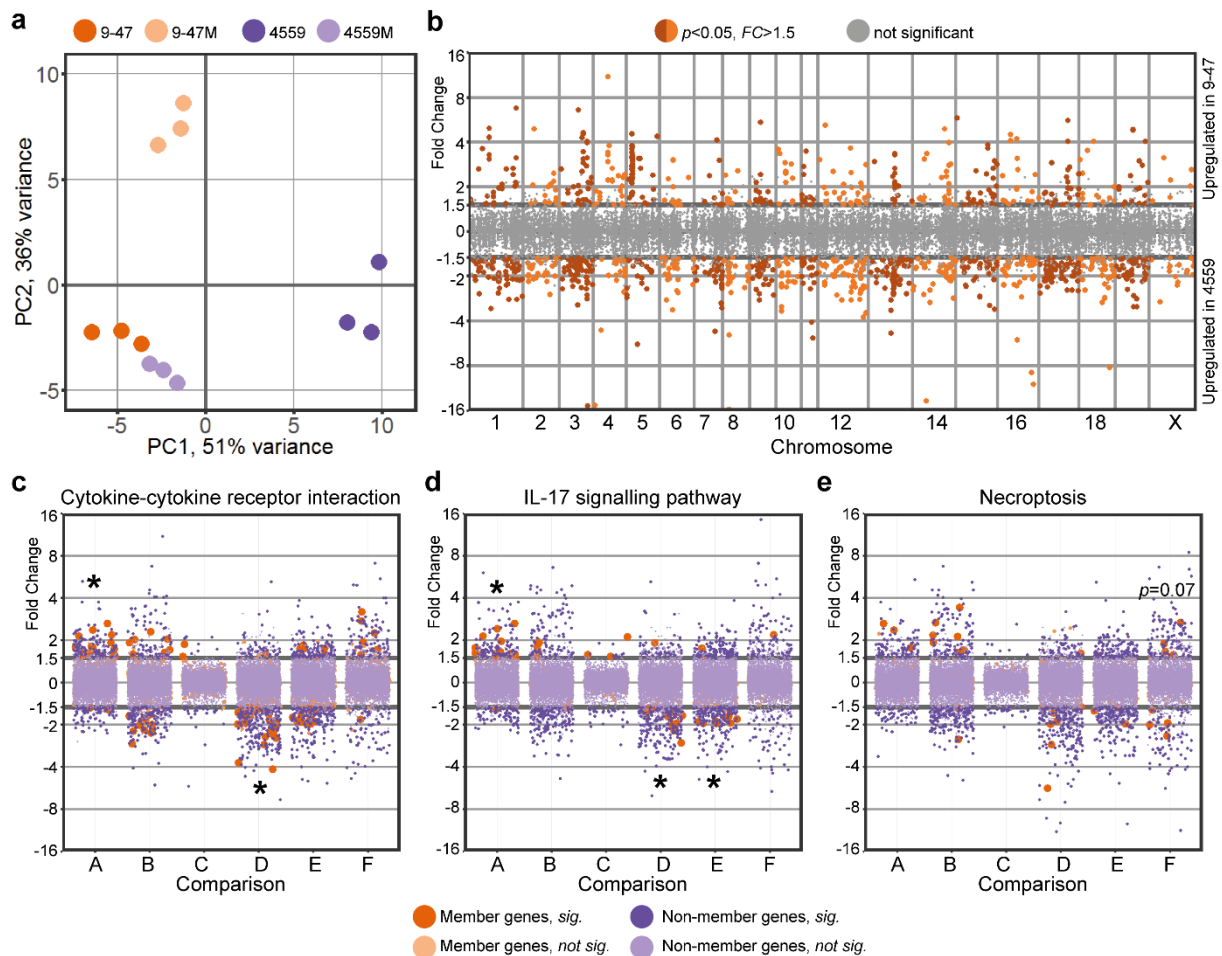

723

724 **Figure 3.** Single nucleotide polymorphism in pneumococcal *rafR* drives diverging host response.

725 (a). PCA plot illustrates murine lung response to the pneumococcal strains. Interestingly, host  
 726 transcriptional response to *rafR* swap in blood isolate (4559M, light purple) is similar to the murine  
 727 response to the original ear strain (9-47-Ear, dark orange). (b). Differential gene expression of  
 728 transcriptional response to pneumococcal ear and blood isolates shows a widespread transcriptional  
 729 rewiring. Specifically, 433 genes are activated in response to infection by ear isolate (9-47-Ear)  
 730 while 787 genes are activated ( $FC > 1.5$ ,  $p < 0.05$ ) by blood isolate (4559-Blood). Specific gene  
 731 ontology terms are enriched in differentially expressed host genes in response to pneumococcal  
 732 infection: cytokine-cytokine receptor interaction (c), interleukin-17 signaling pathway (d) and  
 733 necroptosis (e). A: comparison between 9-47-Ear to 9-47M; B: 9-47-Ear to 4559-Blood; C: 9-47-  
 734 Ear to 4559M; D: 9-47M to 4559-Blood; E: 9-47M to 4559M and F: 4559-Blood to 4559M. \*  
 735 denotes statistically significant functional enrichment for the indicated strain-strain comparison.

736  
737  
738  
739  
740  
741  
742  
743  
744  
745  
746  
747  
748  
749  
750  
751  
752  
753  
754  
755  
756  
757  
758

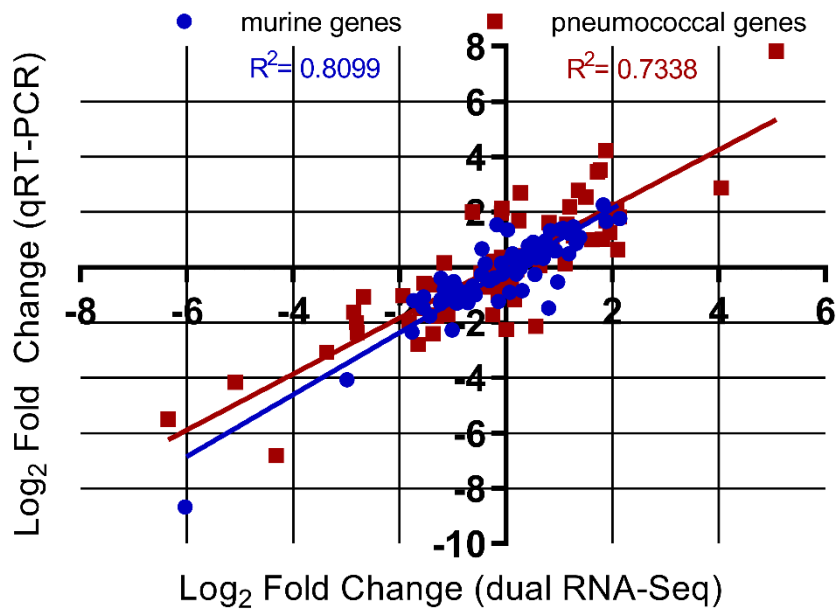

**Figure 4.** Gene expression values from the dual RNA-seq were confirmed by qRT-PCR, using the same isolated RNA used for the dual RNA-seq. 18 murine and 19 pneumococcal genes were chosen as validation targets. Log<sub>2</sub> fold changes were plotted from qRT-PCR against dual RNA-seq log fold changes for 9-47-Ear vs 4559-Blood, 9-47-Ear vs 9-47M, 9-47M vs 4559M and 4559-Blood vs 4559M comparisons. A total of 72 murine and 76 pneumococcal comparisons were plotted, with a high degree of correlation observed for both species ( $R^2 > 0.73$ , Pearson).

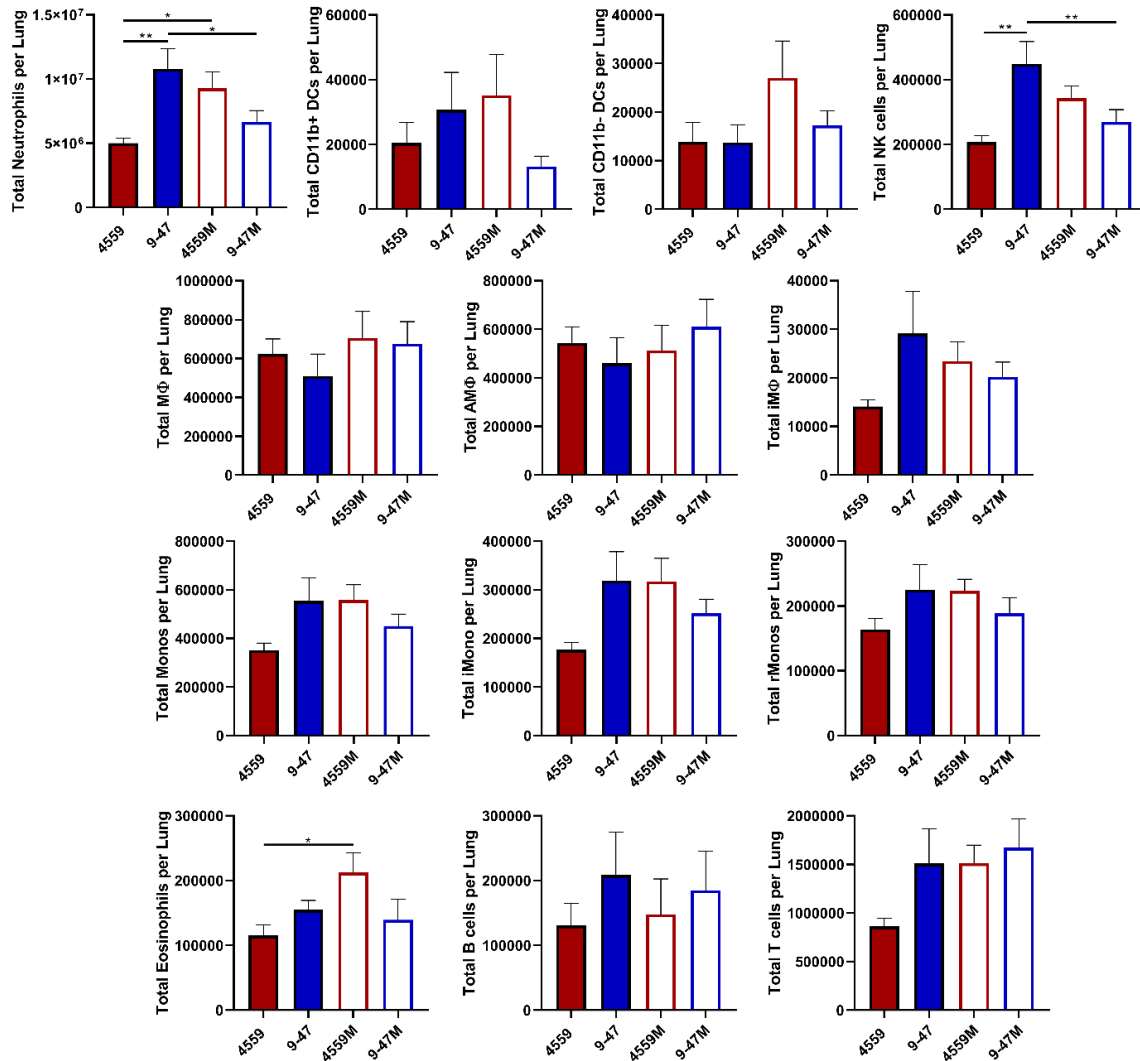

759

760 **Fig. 5.** Quantification of immune cell subsets in murine lungs 6 h post infection. Groups of 8 mice  
 761 per strain were challenged with either 9-47-Ear, 4559-Blood, 9-47M or 4559M. Single cell lung  
 762 suspensions were prepared and stained with antibodies against various surface markers (**Table 1**)  
 763 and analyzed by flow cytometry. Populations enumerated include: natural killer (NK) cells,  
 764 neutrophils, eosinophils, inflammatory monocytes (iMono), resident monocytes (rMono), alveolar  
 765 macrophages (AM $\Phi$ ), interstitial macrophages (iM $\Phi$ ), CD11b-negative dendritic cells (CD11b-  
 766 DC), CD11b-positive dendritic cells (CD11b+ DC), T cells and B cells. Graphs shown represent  
 767 pooled data from two independent experiments. All quantitative data are presented as  
 768 mean  $\pm$  S.E.M ( $n = 16$  for each group), analyzed by one-way ANOVA (\* $P < 0.05$ ; \*\* $P < 0.01$ ).

769

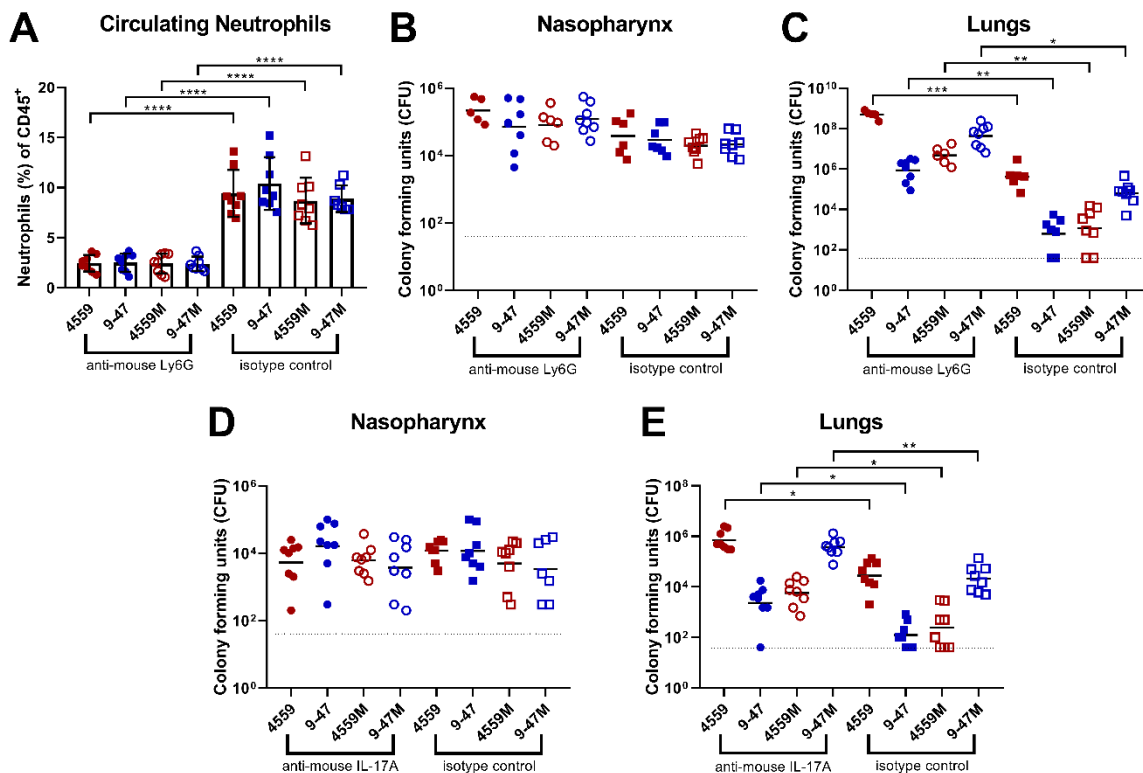

770

771 **Figure 6.** Impact of neutrophil depletion or anti-IL-17A on pneumococcal virulence. Groups  
 772 of 8 mice were treated with either 350  $\mu$ g of rat anti-mouse Ly6G or rat IgG2a isotype control,  
 773 one and two days prior to pneumococcal challenge (B & C), or with IL-17A or mouse IgG1  
 774 isotype control (D & E), one day before, 2 h before and 6 h after intranasal challenge (see  
 775 materials and methods). (A) Percentage of circulating neutrophils relative to live (CD45<sup>+</sup>) cells  
 776 were calculated. Differences in circulating neutrophils between groups are indicated by  
 777 asterisks: \*\*\*\*,  $P < 0.0001$ , by one-way ANOVA. (B, C, D & E) 24 h post-infection, numbers  
 778 of pneumococci in the nasopharynx and lungs were quantitated (see Materials and Methods).  
 779 NB: n is <8 for some groups because didn't survive the challenge procedure, or until the time  
 780 of harvest. Viable counts (total CFU per tissue) are shown for each mouse at each site;  
 781 horizontal bars indicate the geometric mean (GM) CFU for each group; the broken line indicates  
 782 the threshold for detection. Differences in GM bacterial loads between groups are indicated by  
 783 asterisks: \*,  $P < 0.05$ , \*\*,  $P < 0.01$ , \*\*\*,  $P < 0.001$ , by unpaired  $t$ -test.
